# Supplementary material for: Identification of kidney cell types in scRNA-seq and snRNA-seq data using machine learning algorithms
Source: PubMed Central journal article supplement — Heliyon. 2024 Sep 27;10(19):e38567. doi: 10.1016/j.heliyon.2024.e38567 (PMC11471582; doi:10.1016/j.heliyon.2024.e38567), 2024-09-27

## Supplementary Figures

**Figure S1.** Distribution of renal cells in our combined cohort by (a) known sampling location, (b) sequencing technology, and (c) donor sex. Cells with unknown sampling location are excluded from this figure.

(A)

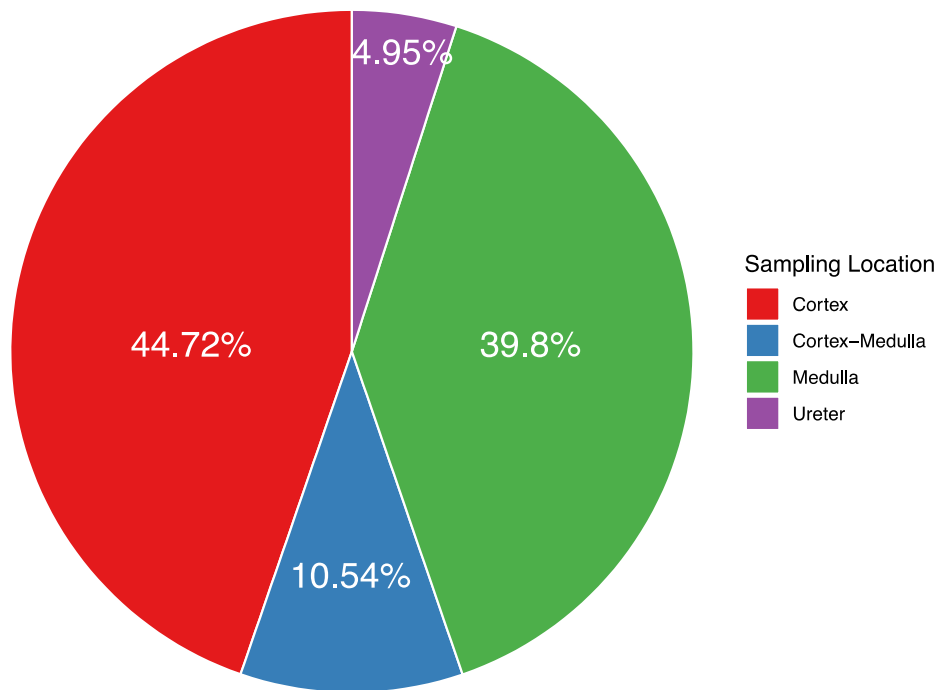

(B)

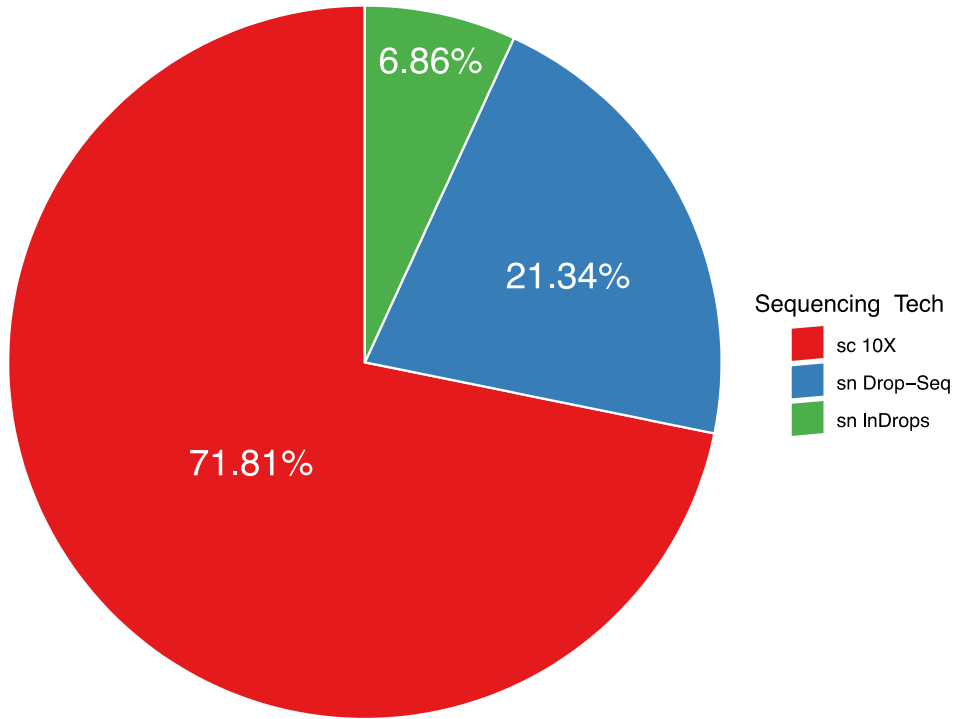

(C)

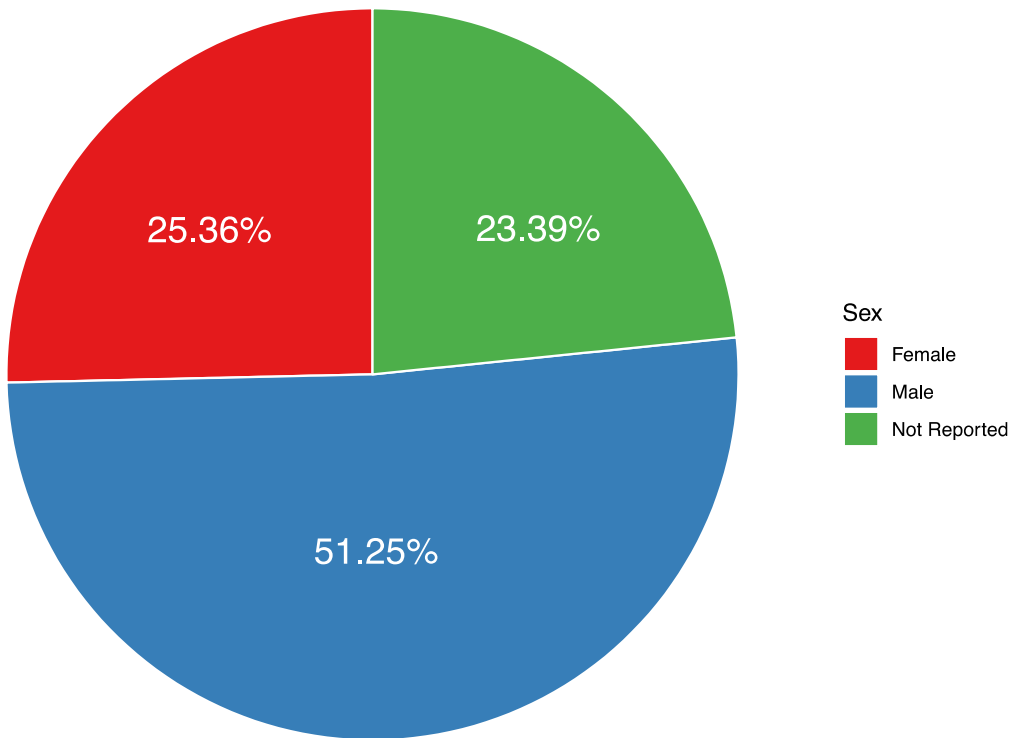

**Figure S2:** Uniform manifold approximation and projection for dimension reduction (UMAP) and t-distributed stochastic neighbor embedding (t-SNE) visualizations of each dataset generated using the code provided by authors in their publication or sent to us directly for (A) Lake et al., (B) Liao et al., (C) Menon et al., (D) Wu et al., (E) Young et al.

(A)

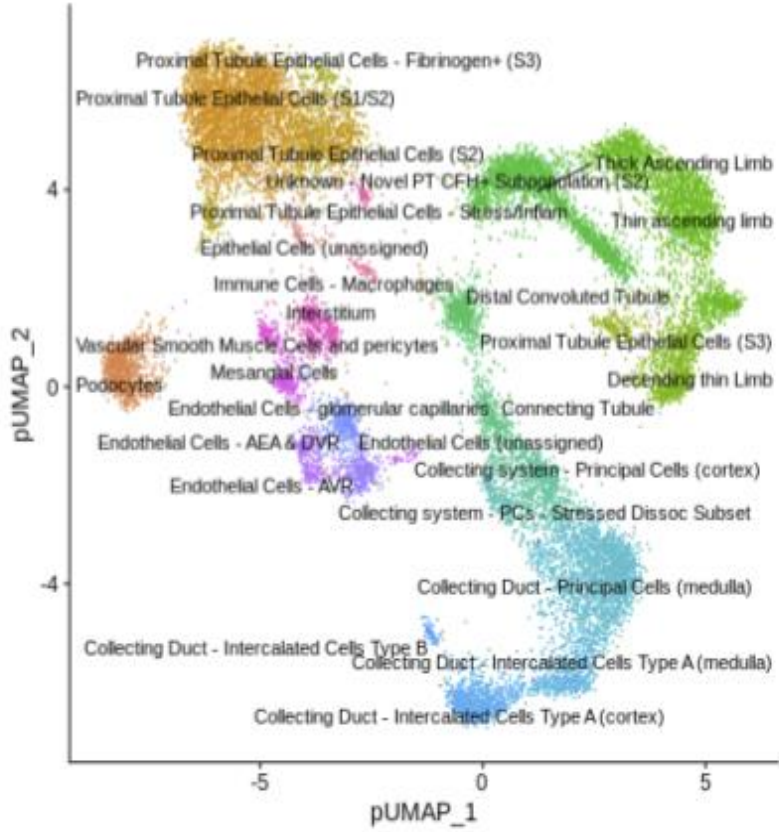

(B)

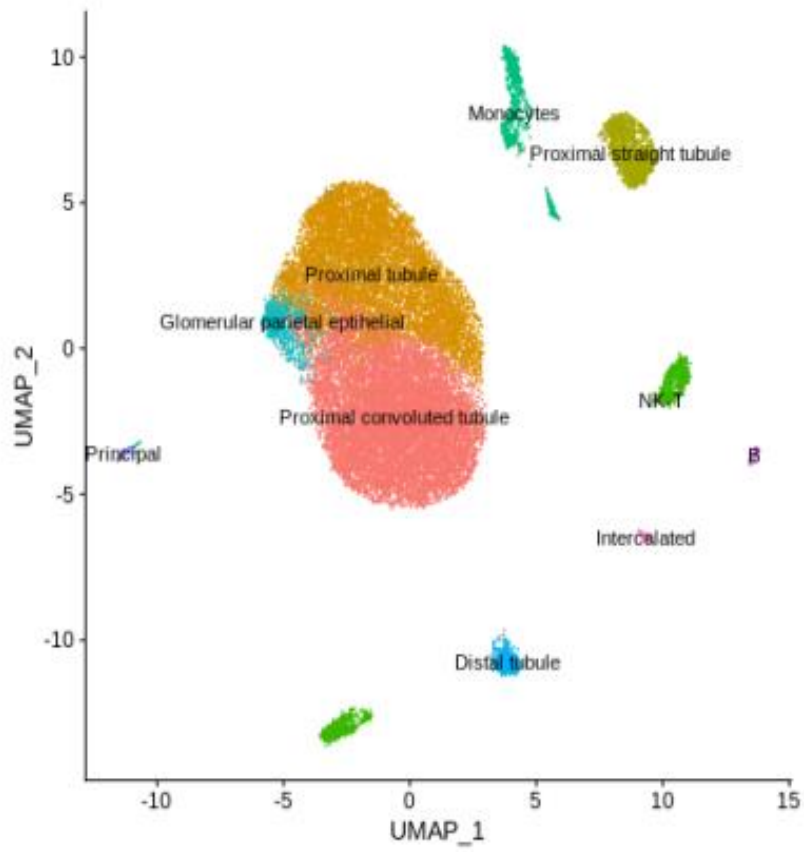

(C)

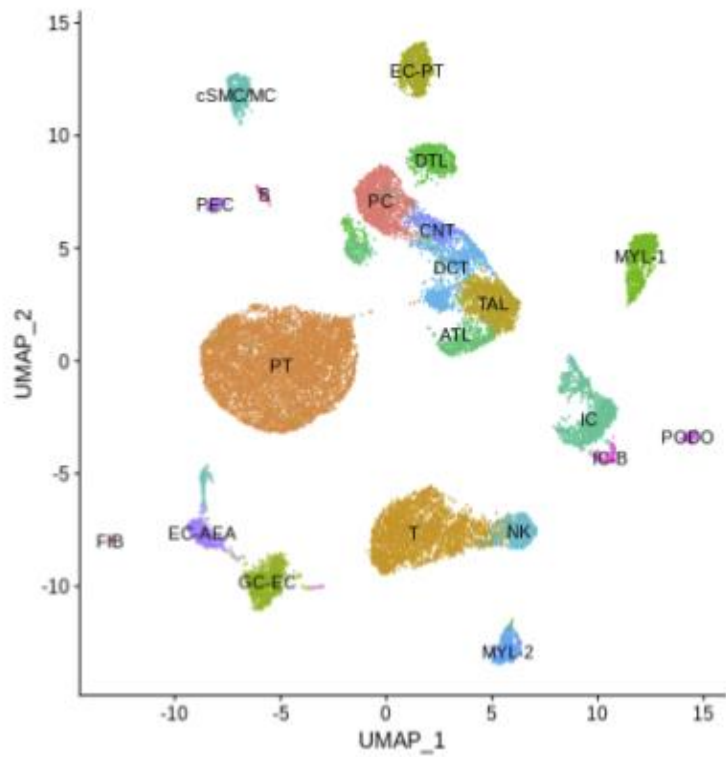



(D)

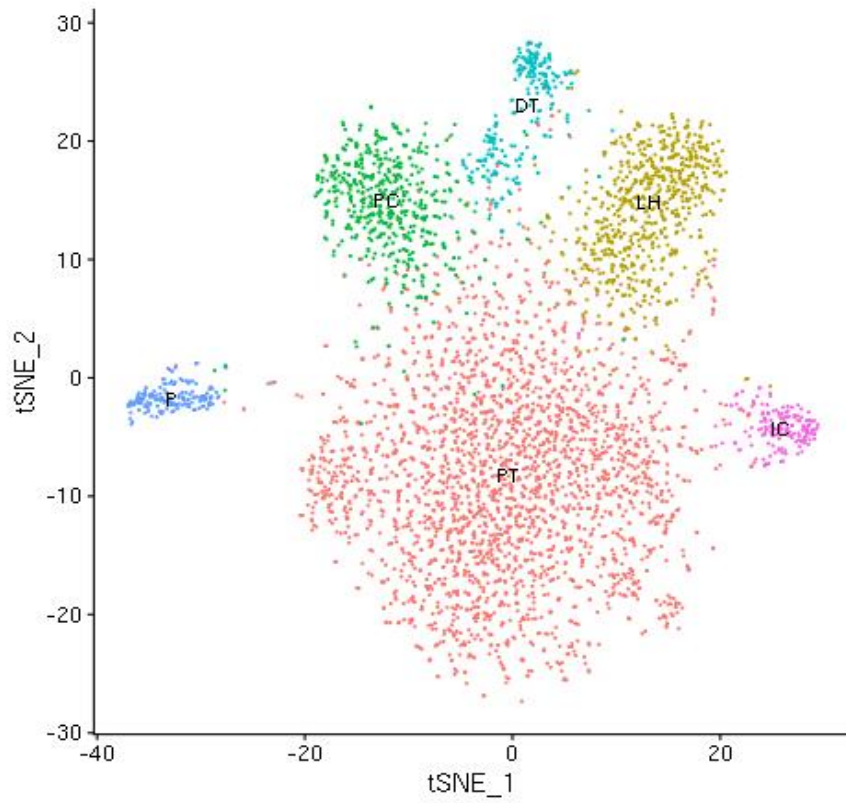

(E)

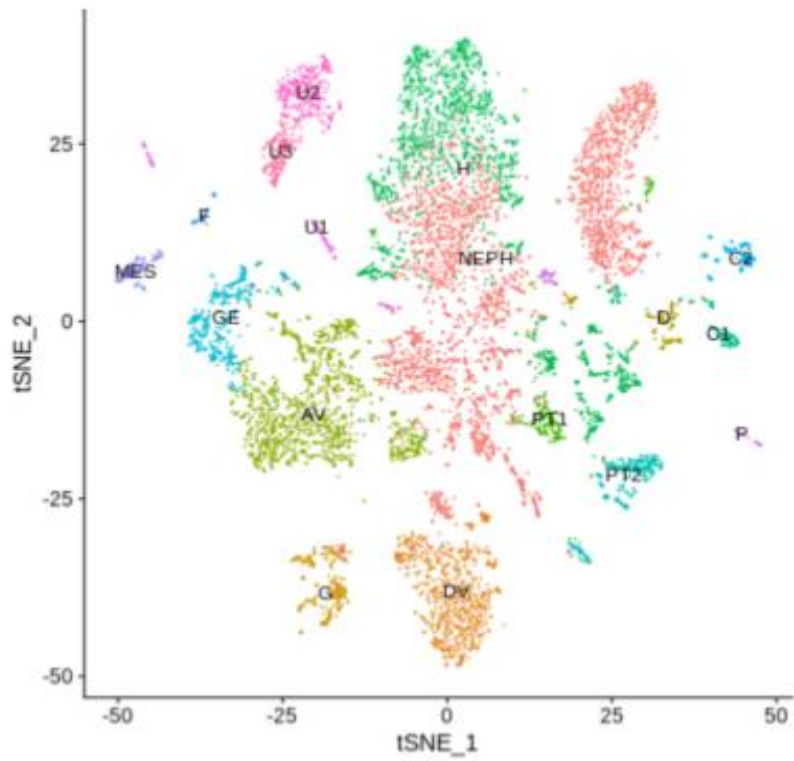

**Figure S3.** Barcharts showing (a) the distribution of cell counts by harmonized cell type and (b) the proportion of cells from each study for each harmonized cell type.

(A)

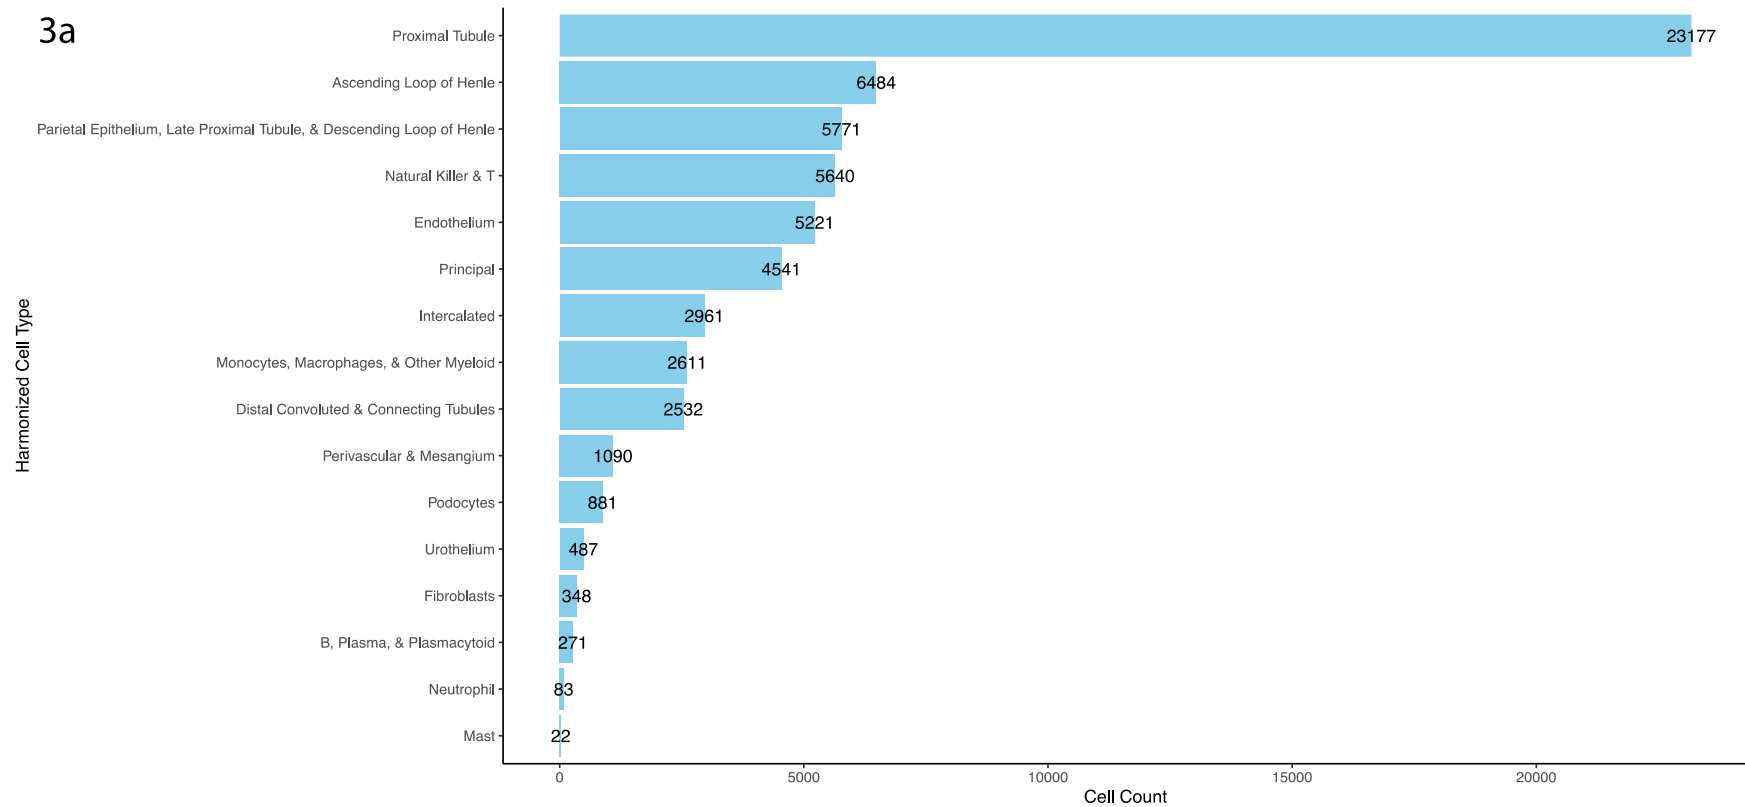

(B)

3b

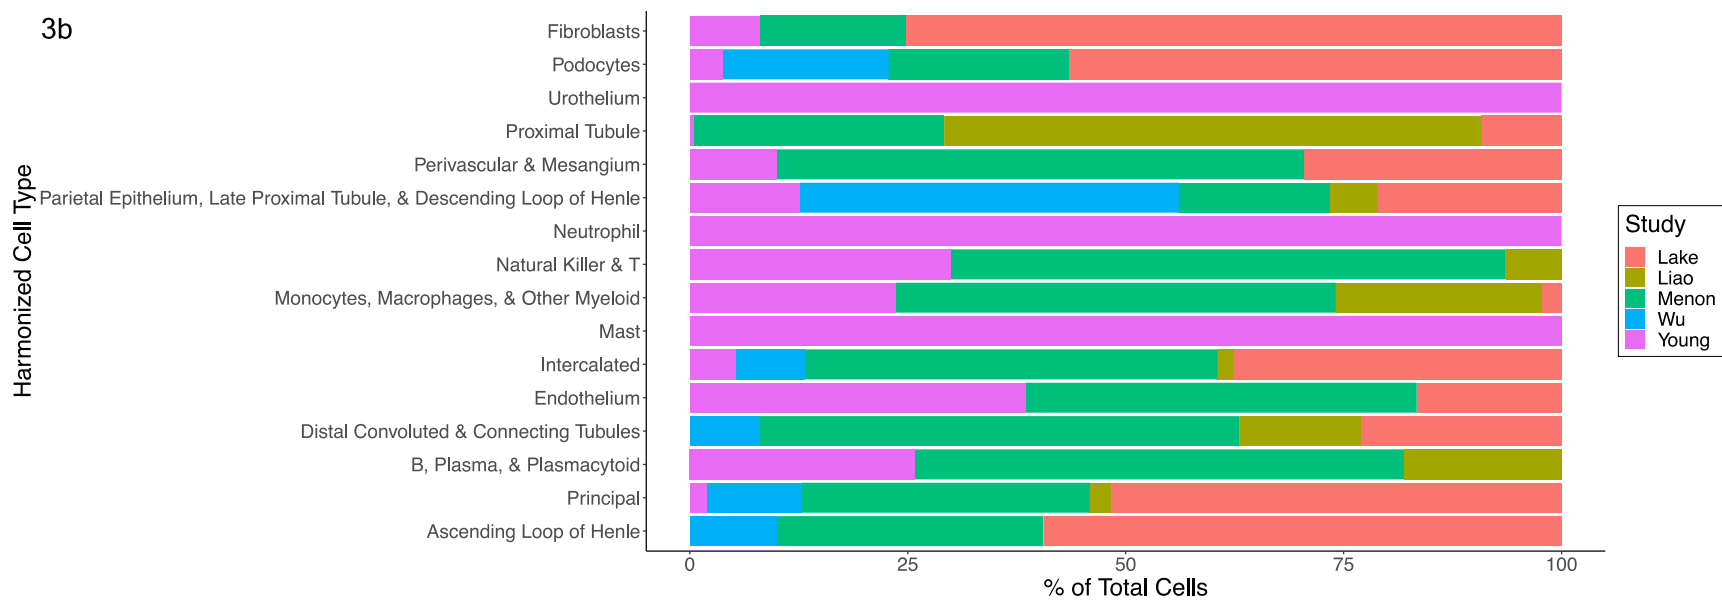

**Figure S4.** UMAP visualizations of the combined dataset (a) before batch correction, (b) after batch correction, and (c) after batch correction colored by harmonized cell type.

(A)

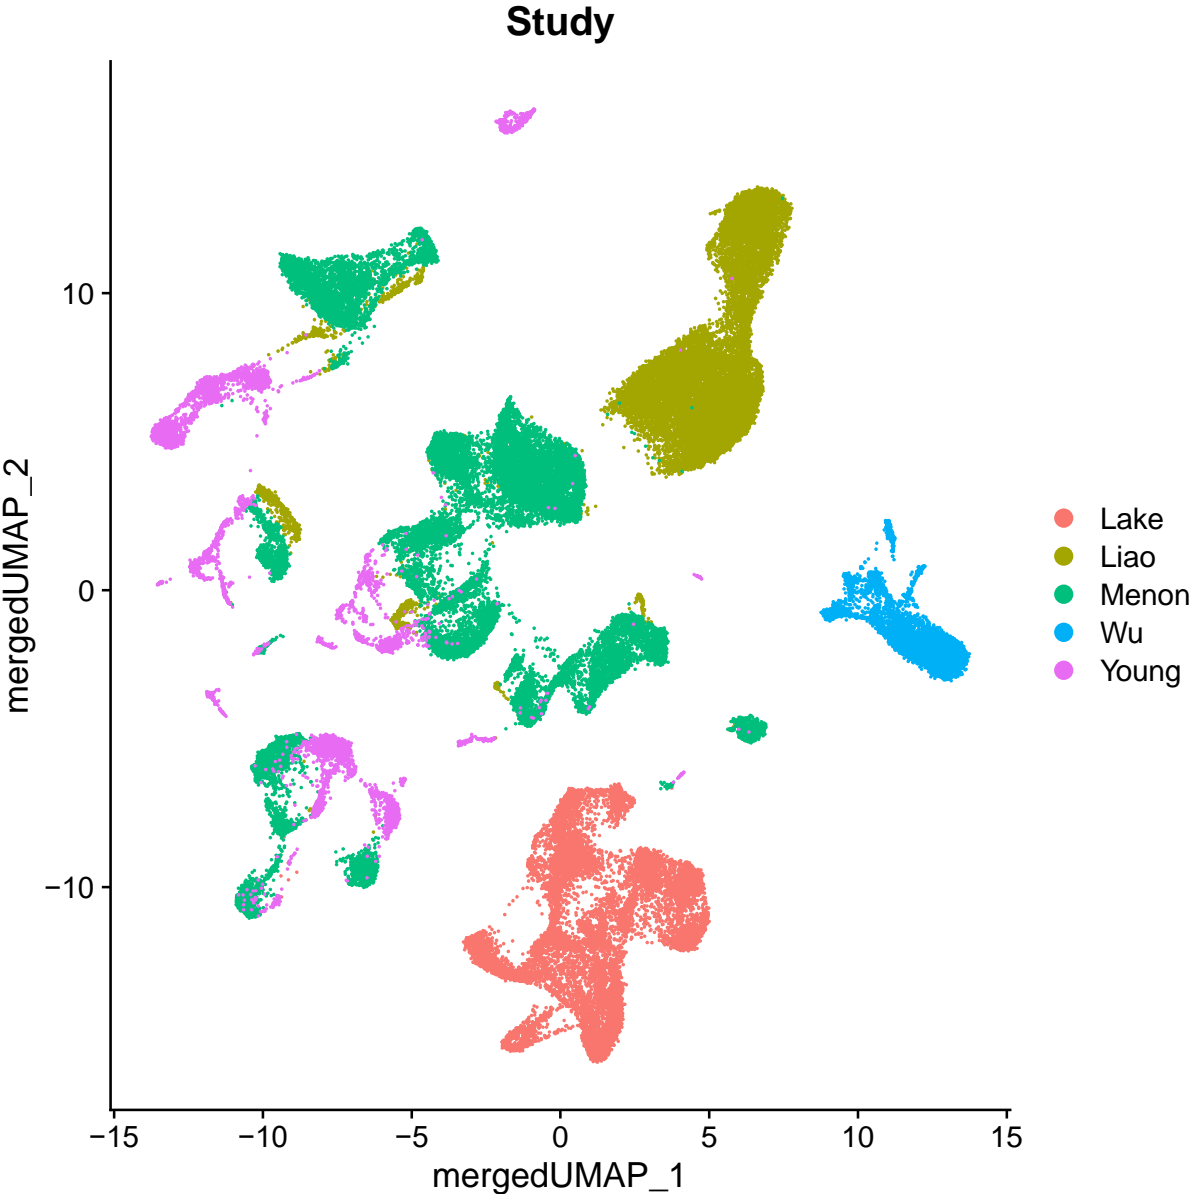

(B)

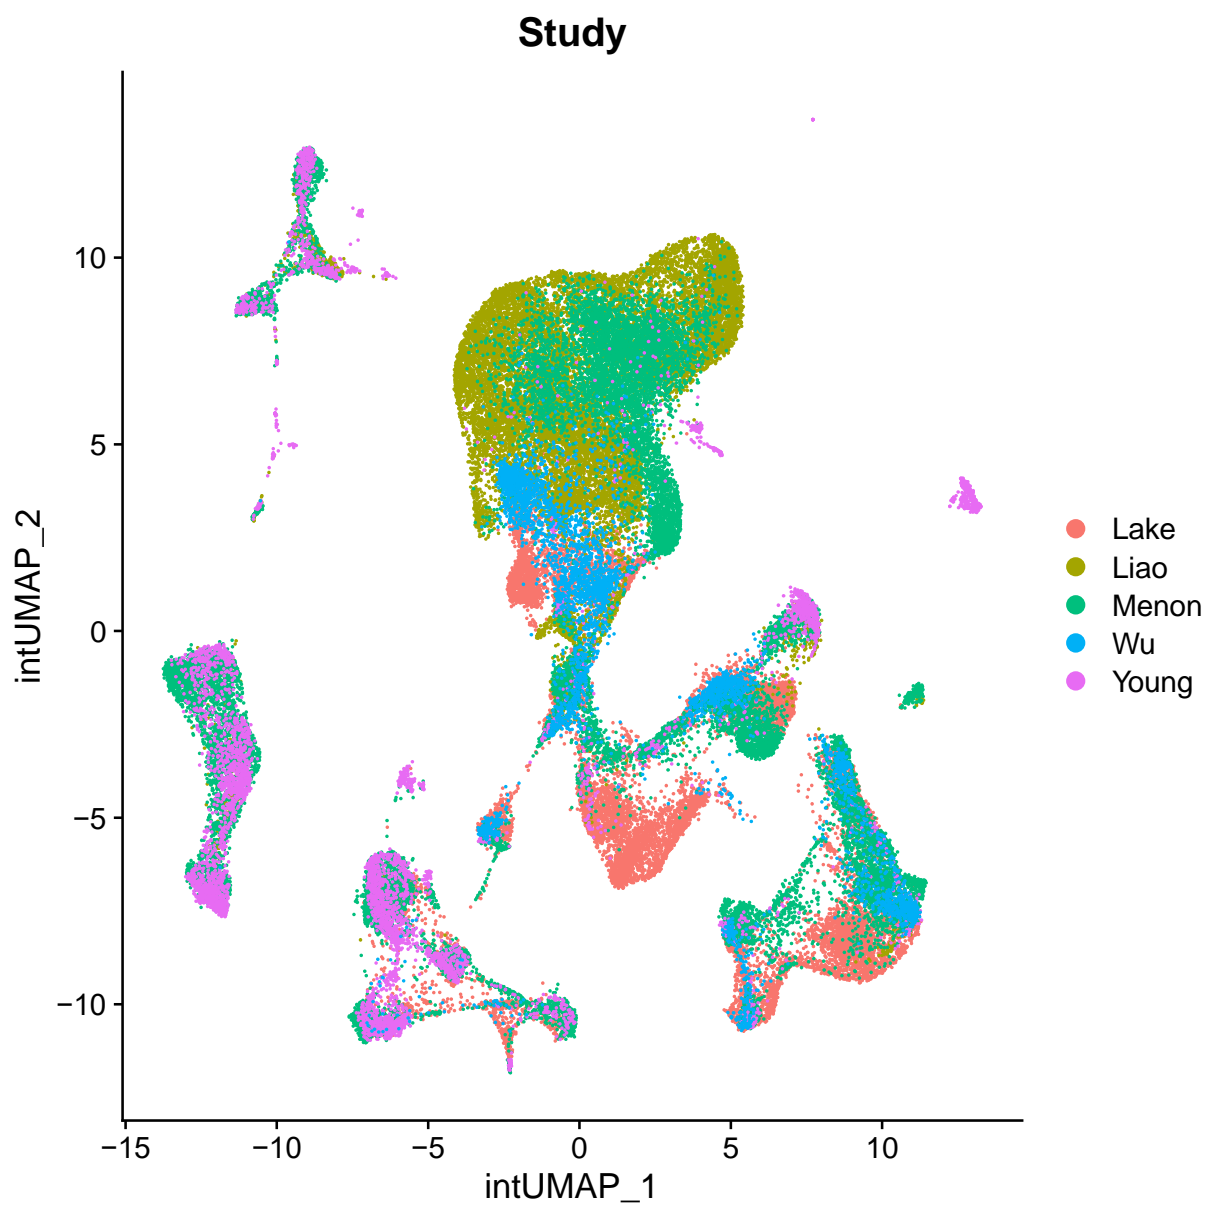

(C)

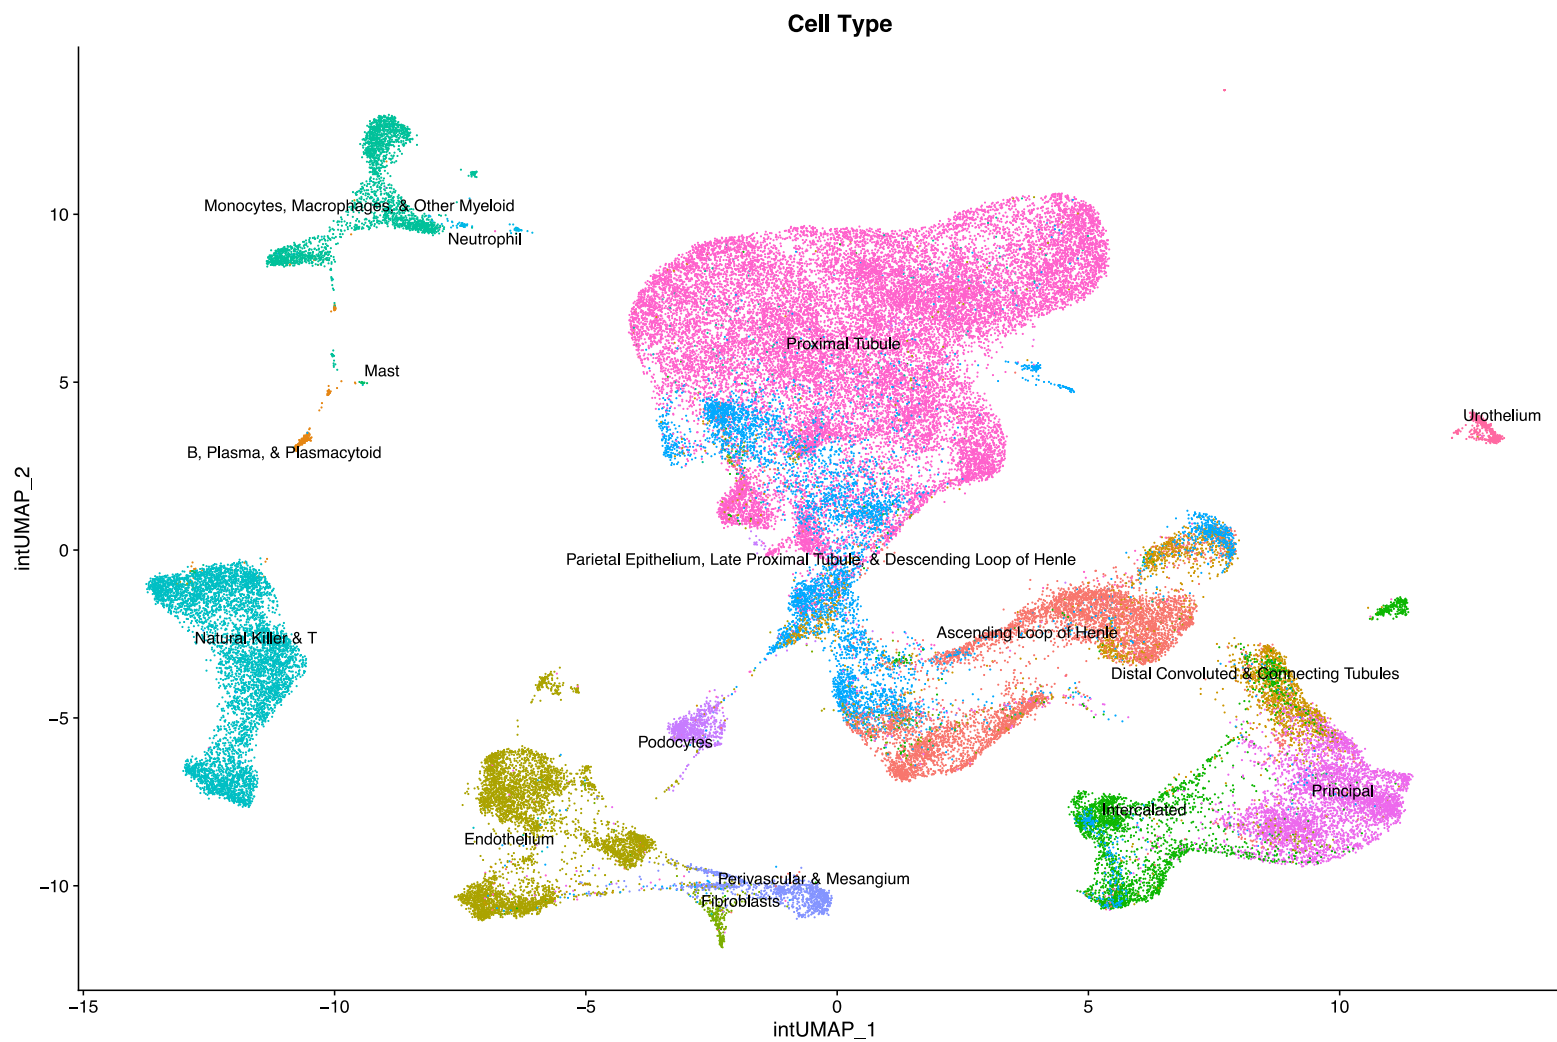



**Table S1.** Distribution of 57,864 renal cells used in our analyses, following SVM-based exclusion of low-quality cells.

| <b>Contribution to Harmonized Cell Type Counts by Study</b>           |                    |                    |                     |                  |                     |              |
|-----------------------------------------------------------------------|--------------------|--------------------|---------------------|------------------|---------------------|--------------|
| <b>Harmonized Cell Type</b>                                           | <b>Lake et al.</b> | <b>Liao et al.</b> | <b>Menon et al.</b> | <b>Wu et al.</b> | <b>Young et al.</b> | <b>Total</b> |
| Ascending Loop of Henle                                               | 3620               | 0                  | 1835                | 581              | 0                   | 6036         |
| B, Plasma, & Plasmacytoid                                             | 0                  | 42                 | 129                 | 0                | 69                  | 240          |
| Distal Convolutd & Connecting Tubules                                 | 344                | 309                | 745                 | 183              | 0                   | 1581         |
| Endothelium                                                           | 717                | 0                  | 2308                | 0                | 1956                | 4981         |
| Fibroblasts                                                           | 191                | 0                  | 51                  | 0                | 28                  | 270          |
| Intercalated                                                          | 976                | 48                 | 1336                | 215              | 153                 | 2728         |
| Mast                                                                  | 0                  | 0                  | 0                   | 0                | 22                  | 22           |
| Monocytes, Macrophages, & Other Myeloid                               | 16                 | 490                | 1307                | 0                | 616                 | 2429         |
| Natural Killer & T                                                    | 0                  | 351                | 3582                | 0                | 1672                | 5605         |
| Neutrophil                                                            | 0                  | 0                  | 0                   | 0                | 77                  | 77           |
| Parietal Epithelium, Late Proximal Tubule, & Descending Loop of Henle | 980                | 71                 | 738                 | 2230             | 568                 | 4587         |
| Perivascular & Mesangium                                              | 265                | 0                  | 654                 | 0                | 107                 | 1026         |
| Podocytes                                                             | 468                | 0                  | 174                 | 138              | 33                  | 813          |
| Principal                                                             | 2157               | 82                 | 1429                | 426              | 59                  | 4153         |
| Proximal Tubule                                                       | 1950               | 14157              | 6639                | 0                | 84                  | 22830        |
| Urothelium                                                            | 0                  | 0                  | 0                   | 0                | 486                 | 486          |



**Figure S6.** Heatmap of each classifier's rejection rate on (a) Menon et al., (b) Lake et al., (c) Liao et al. and (d) Wu et al with respect to each cell type.

(a)

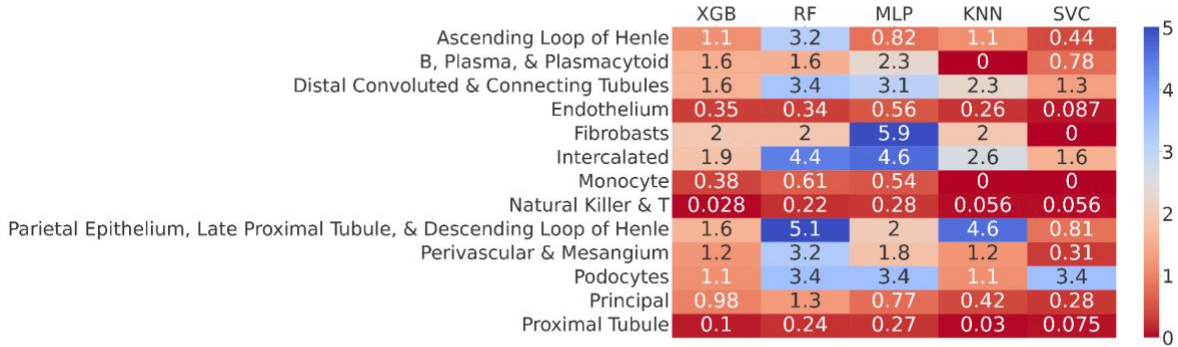

(b)

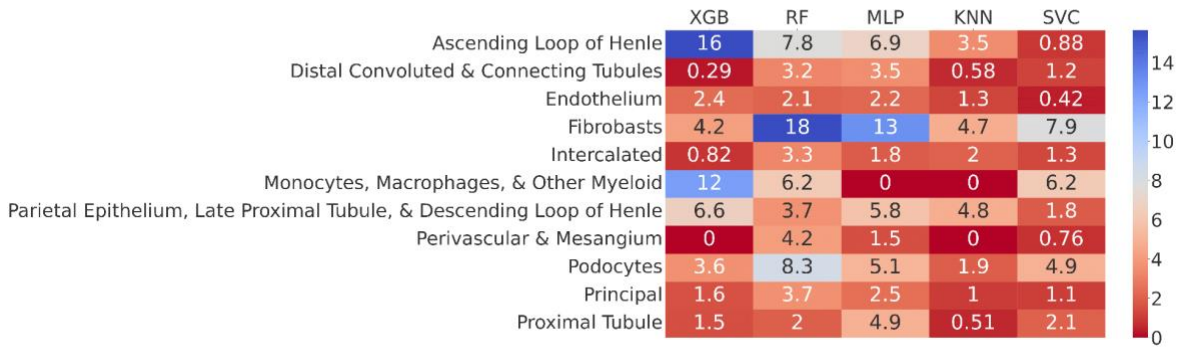

(c)

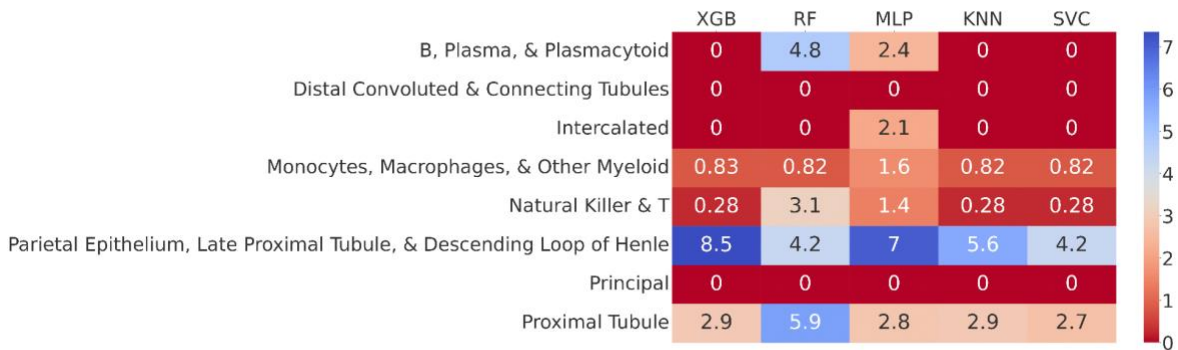

(d)

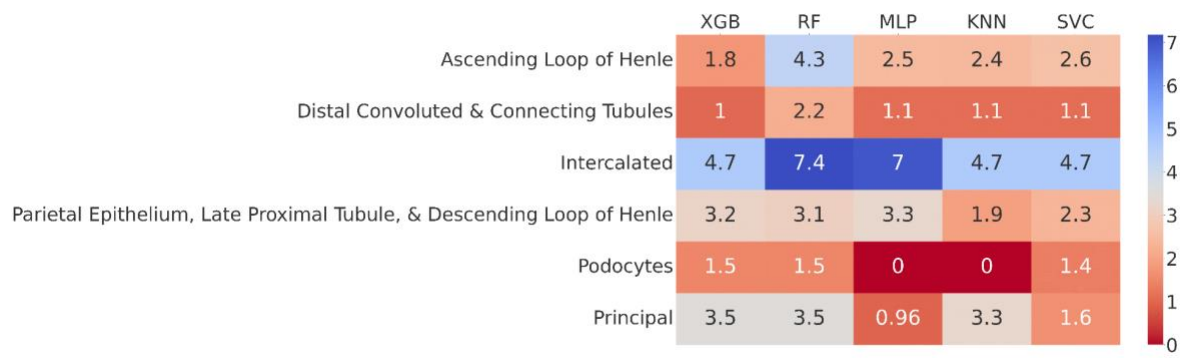

**Figure S7.** Heatmap of each classifier's F1 score on Liao et al. with respect to each cell type.

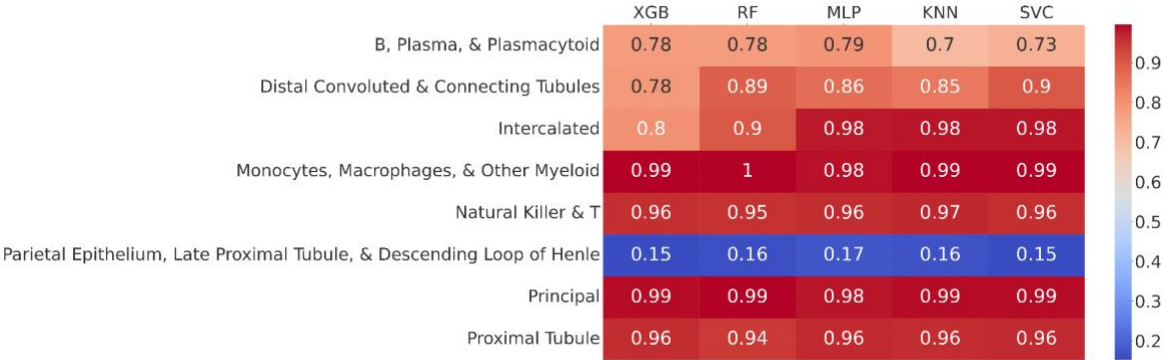

Figure S8: Schematic of our study snakemake pipeline.

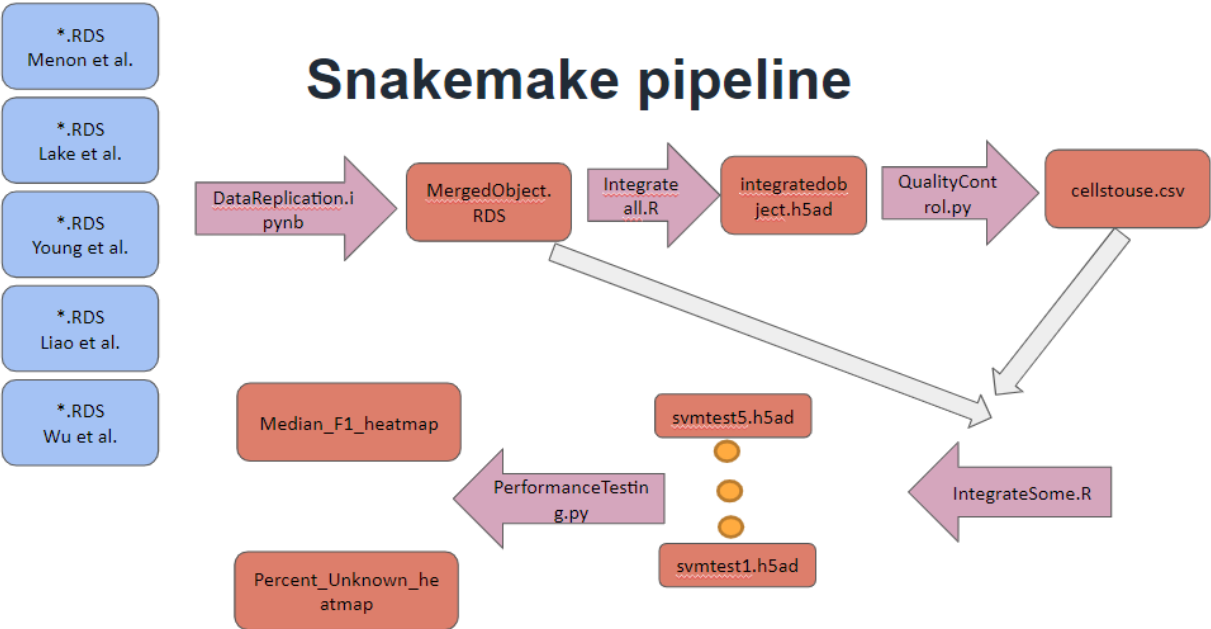

**Figure S9:** Evidence for exclusion of sample “kidney1” from Liao et al. Violin plot of the expression of a mitochondrial gene in each of the three samples from Liao et al showing a uniform abnormally high distribution of kidney1 (left). UMAP of cells in the “Proximal Tubule” harmonized cell type, colored by sample of origin showing that while most samples align with one another, cells from sample kidney1 appear distinct from the group and have poor alignment with the other cells in the same cell type (right).

### Evidence for Exclusion of Sample ‘kidney1’

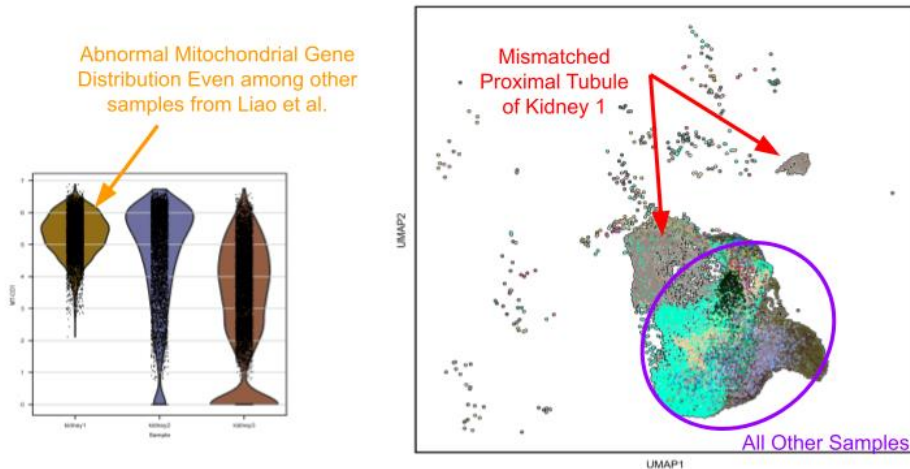

Top 20 Genes - RF Model

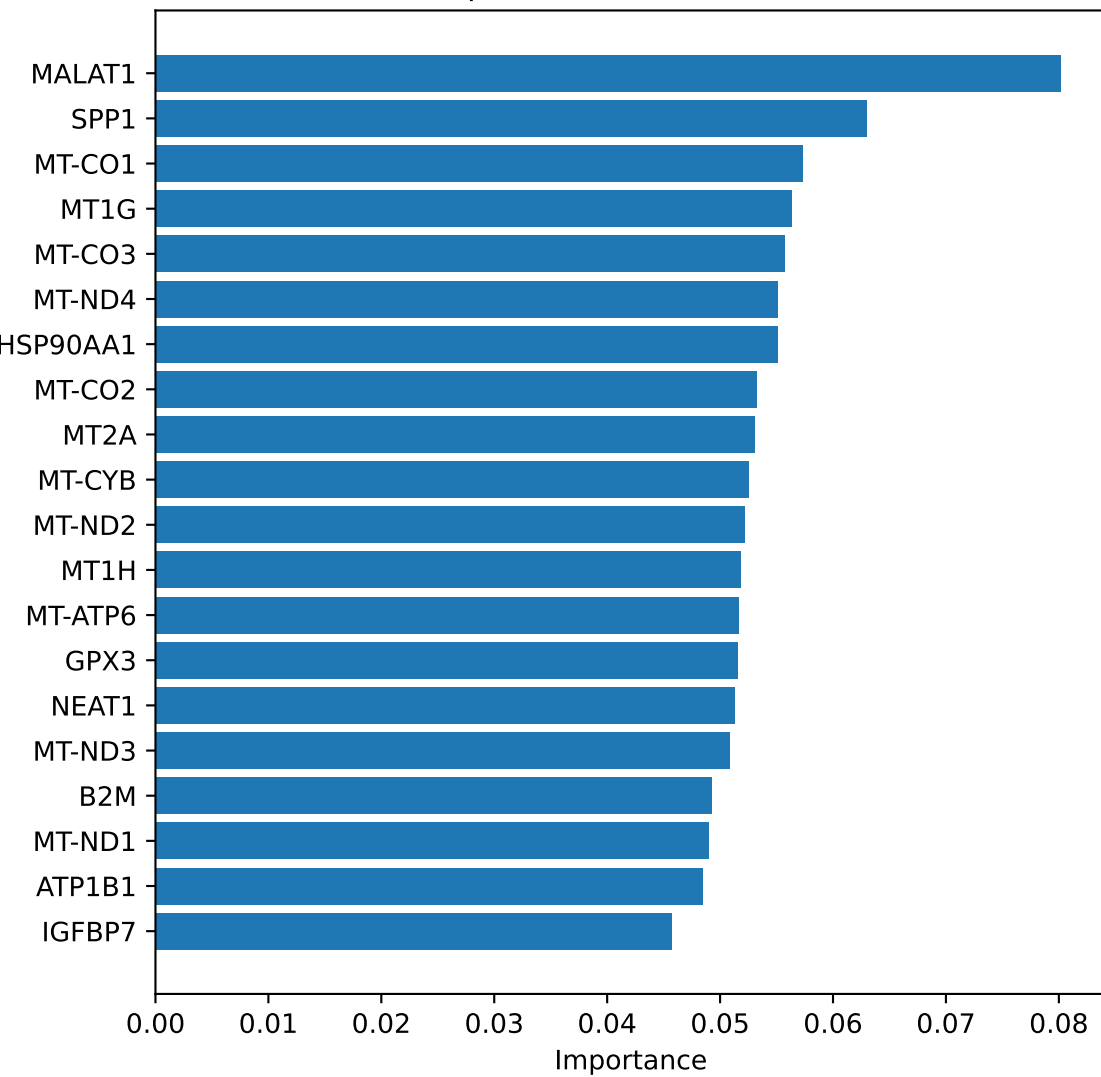

Top 20 Genes - SVC Model

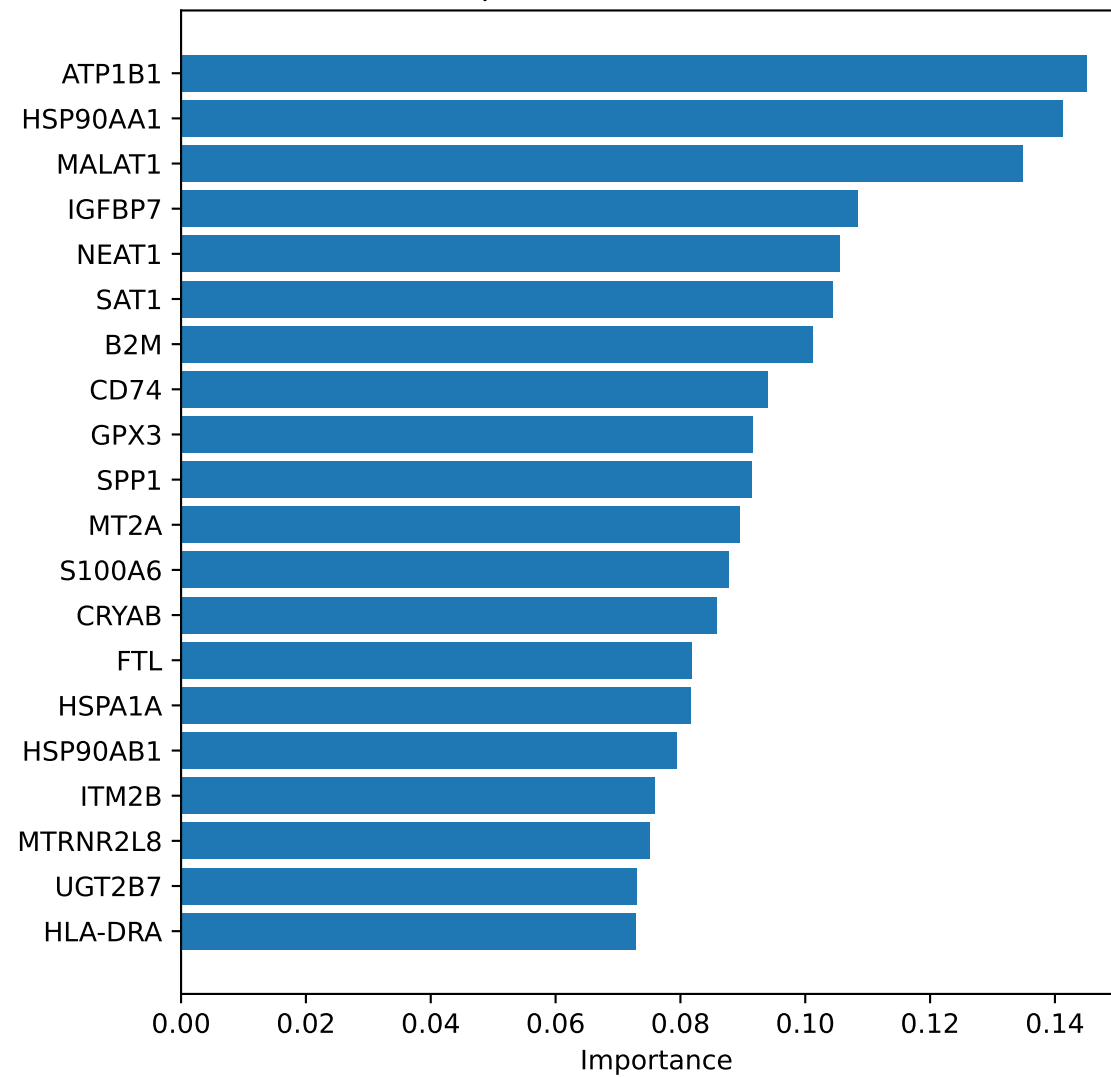

Top 20 Genes - MLP Model

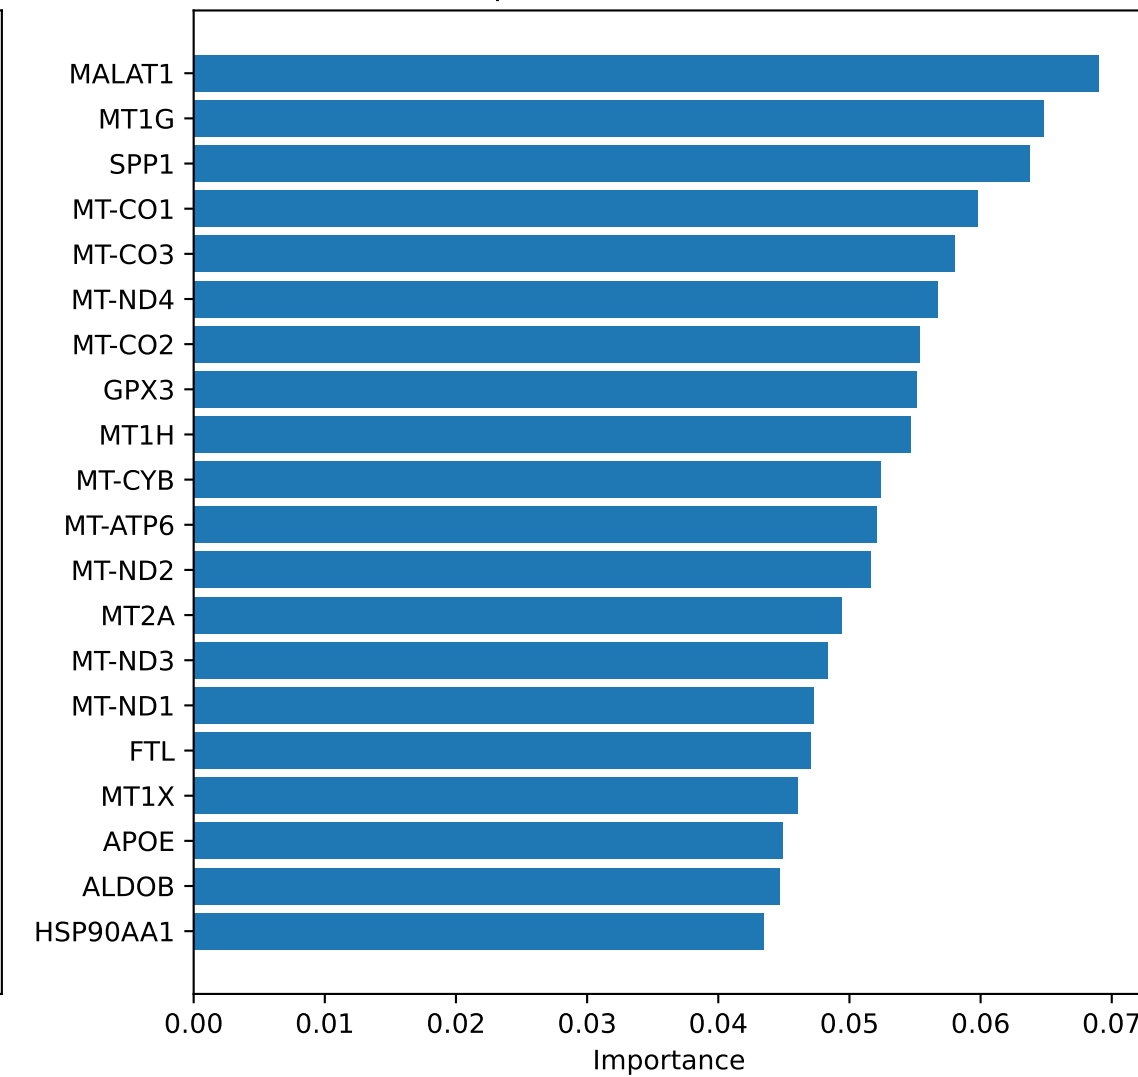

Top 20 Genes - XGBoost Model

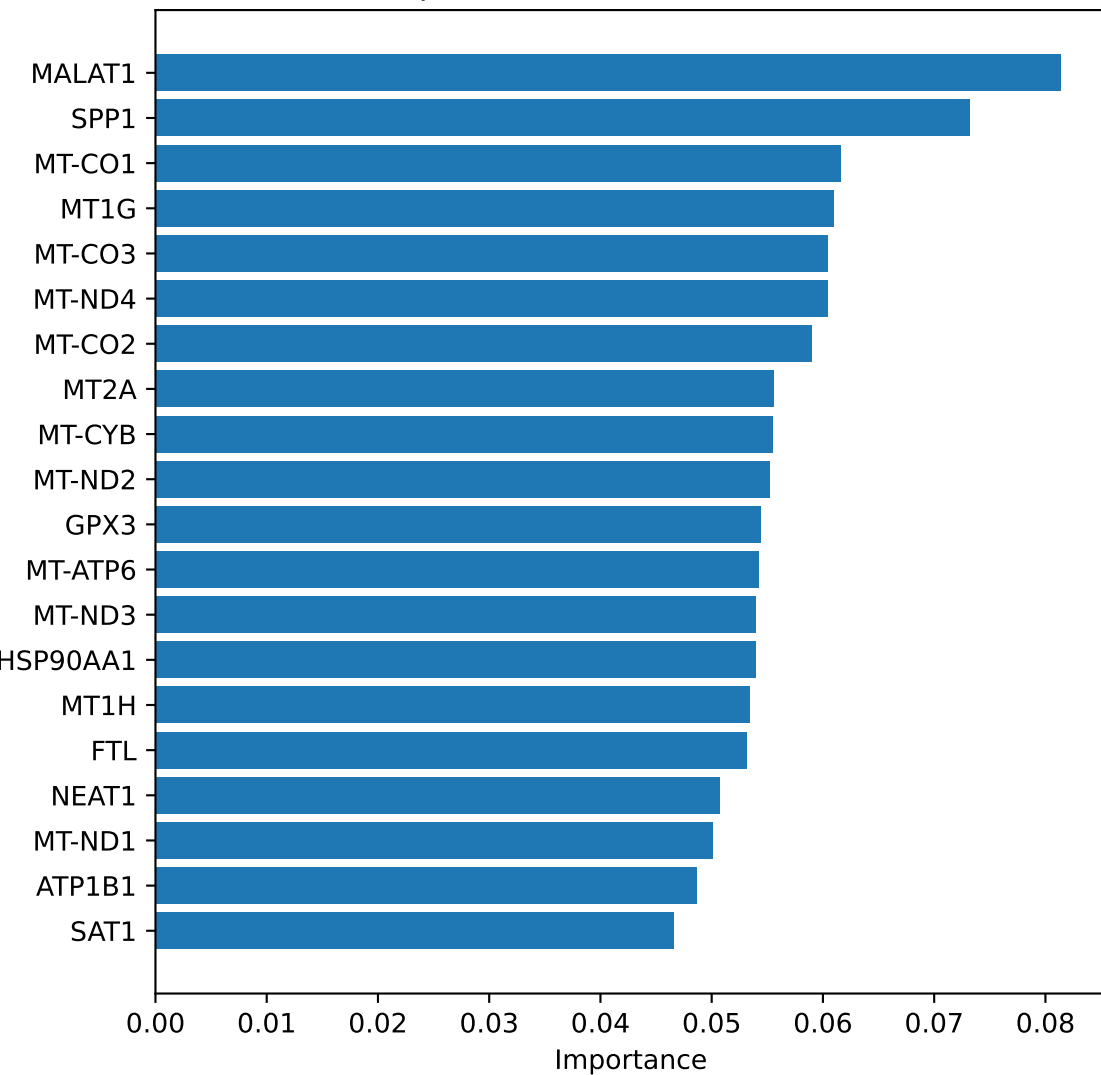

Top 20 Genes - KNN Model

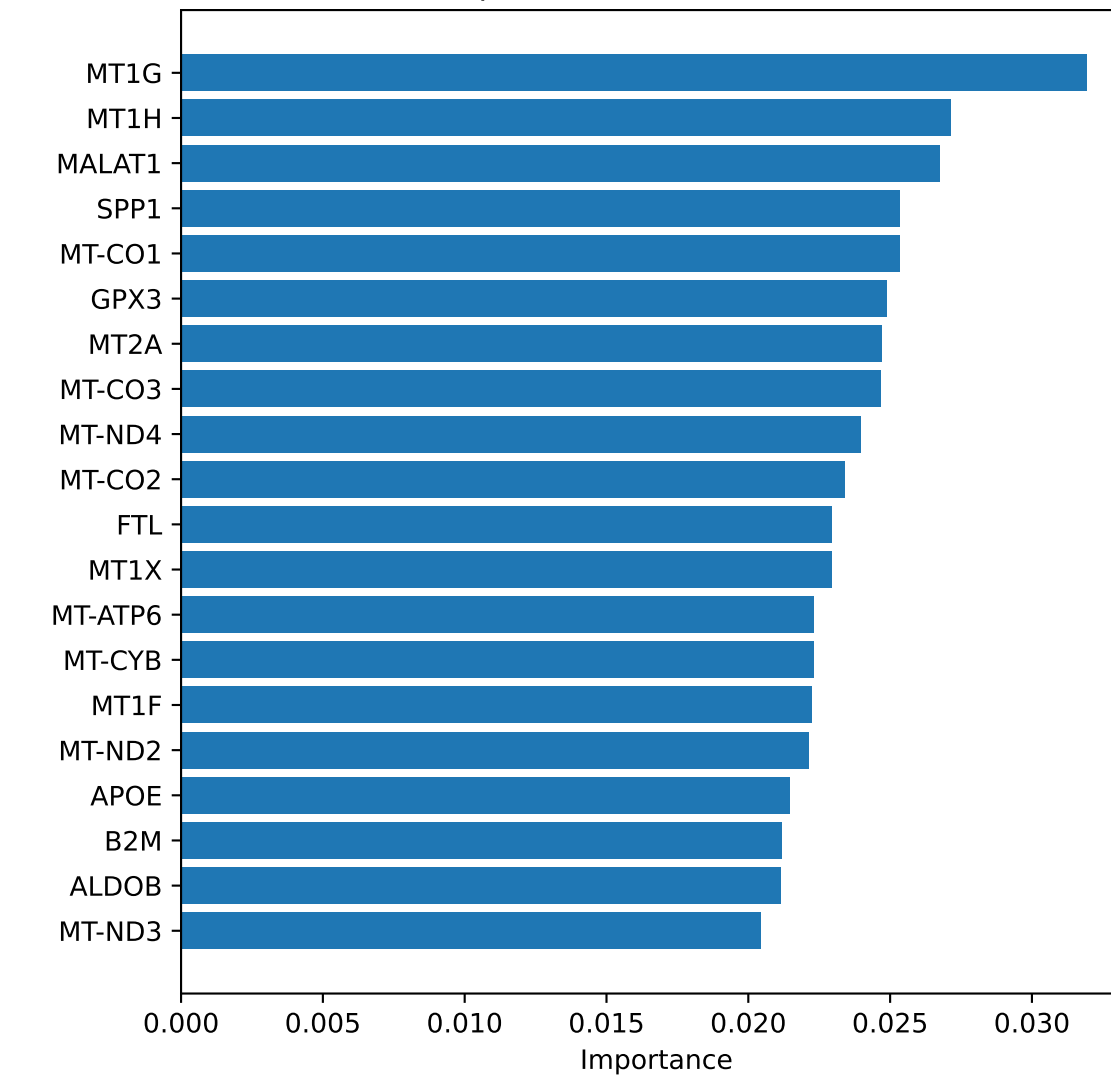

Supplement: mmc3.pdf [file mmc3.pdf]
